# Supplementary material for: Precision communication: Physicians’ linguistic adaptation to patients’ health literacy
Source: PubMed Central journal article supplement — Sci Adv. 2021 Dec 17;7(51):eabj2836. doi: 10.1126/sciadv.abj2836 (PMC8682984; doi:10.1126/sciadv.abj2836), 2021-12-17
Supplement: sciadv.abj2836_sm.pdf [file sciadv.abj2836_sm.pdf]

Supplementary Materials for

**Precision communication: Physicians' linguistic adaptation to patients' health literacy**

Dean Schillinger\*, Nicholas D. Duran, Danielle S. McNamara, Scott A. Crossley,  
Renu Balyan, Andrew J. Karter

\*Corresponding author. Email: dean.schillinger@ucsf.edu

Published 17 December 2021, *Sci. Adv.* 7, eabj2836 (2021)  
DOI: 10.1126/sciadv.abj2836

**This PDF file includes:**

Table S1

| <b>A.</b>                                              |                        |                | <b>B.</b>                                                                         |                        |                |
|--------------------------------------------------------|------------------------|----------------|-----------------------------------------------------------------------------------|------------------------|----------------|
| <b>Physician Complexity Profile Linguistic Indices</b> |                        |                | <b>Patient Health Literacy Profile Linguistic Indices</b>                         |                        |                |
| <b>Label (from NLP tool)</b>                           | <b>Category</b>        | <b>High CP</b> | <b>Label (from NLP tool)</b>                                                      | <b>Category</b>        | <b>High HL</b> |
| Argument overlap, sentences                            | Cohesion               | -              | Argument overlap, paragraph                                                       | Cohesion               | +              |
| Lexical diversity (D)                                  | Lexical diversity      | +              | Attested lemmas (COCA magazine)                                                   | Lexical diversity      | +              |
| Word range score, CW, SUBTLEXus                        | Lexical sophistication | -              | Lexical decision response time (CW)                                               | Lexical sophistication | +              |
| Bigram association strength (delta p), COCA academic   | Lexical sophistication | +              | Number of associations (EAT, FW)                                                  | Lexical sophistication | +              |
| Trigram frequency, COCA newspaper                      | Lexical sophistication | +              | Phonological Neighborhood Frequency (FW)                                          | Lexical sophistication | +              |
| Trigram range, COCA fiction                            | Lexical sophistication | +              | Determiner per nominal phrase                                                     | Syntax                 | +              |
| Word concreteness, AW                                  | Lexical sophistication | -              | Passive auxiliary verbs per clause                                                | Syntax                 | +              |
| Average number of direct object dependencies           | Syntax                 | +              | Dependents per nominal subject                                                    | Syntax                 | +              |
| Construction frequency, SD, COCA fiction               | Syntax                 | +              | Adjective complements per clause                                                  | Syntax                 | +              |
| Terms related to action                                | Cognition              | -              | NOTES: CW=Content words, EAT = Edinburgh association thesaurus, FW=Function words |                        |                |
| Incidence of words related to objects                  | Cognition              | -              |                                                                                   |                        |                |
| Fear and disgust words                                 | Sentiment              | +              |                                                                                   |                        |                |
| Words related to friends and family                    | Sentiment              | -              |                                                                                   |                        |                |
| Words related to joy                                   | Sentiment              | -              |                                                                                   |                        |                |

NOTES: CW=Content words, AW=All words, SD=Standard deviation

**Table S1.** Linguistic indices used to generate the patient health literacy (HL) measure and physician complexity profile (CP). Provided is the name of each index as labeled in the natural language processing (NLP) tool used to compute the index. These indices correspond to broad language categories of cohesion, lexical diversity, lexical sophistication, syntax, and other factors (e.g., cognition, sentiment). The table also

indicates whether each index was more prevalent (positive sign, +) or less prevalent (negative sign, -) in **A**: high CP texts relative to low CP texts and **B**: high HL texts relative to low HL texts. The concordance between CP and HL does not depend on the presence or direction of any single index or small set of indices. Concordance is based on the high-level emergent representations of CP and HL, derived from the totality of indices and their interactions in machine learning models trained to predict expert ratings.
